# Supplementary material for: “I am not telling. The mobile is telling”: Factors influencing the outcomes of a community health worker mHealth intervention in India
Source: PubMed Central journal article supplement (PMC5870994; doi:10.1371/journal.pone.0194927), 2018-03-27
Supplement: pone.0194927.s001.pdf [file pone.0194927.s001.pdf]

S1 File. CHW Survey

|                                                                            |                |                  |                         |                           |             |
|----------------------------------------------------------------------------|----------------|------------------|-------------------------|---------------------------|-------------|
| <b>INSTRUCTION: Write or circle your answer(s) to the questions below.</b> |                |                  |                         |                           |             |
| <b>Age</b>                                                                 |                |                  |                         |                           |             |
| <b>Education level</b>                                                     | <b>Primary</b> | <b>Secondary</b> | <b>Higher Secondary</b> | <b>College/University</b> |             |
| <b>When did you become a Sahiyya?</b>                                      | <b>2005</b>    | <b>2006</b>      | <b>2007</b>             | <b>2008</b>               | <b>2009</b> |
|                                                                            | <b>2010</b>    | <b>2011</b>      | <b>2012</b>             | <b>2013</b>               | <b>2014</b> |
| <b>When did you join MfM?</b>                                              | <b>2011</b>    | <b>2012</b>      | <b>2014</b>             | <b>2015</b>               |             |

|           |                                                                                            |                             |                           |                               |                                         |
|-----------|--------------------------------------------------------------------------------------------|-----------------------------|---------------------------|-------------------------------|-----------------------------------------|
| <b>1.</b> | In general, how often did you use MfM in the last month?                                   | <b>0-2</b>                  | <b>3-4</b>                | <b>5-6</b>                    | <b>More than 6</b>                      |
| <b>2.</b> | Which components of the MfM application do you use during work?<br>(Circle all that apply) | <b>Registration</b>         | <b>ANC</b>                | <b>INC</b>                    | <b>PNC</b>                              |
|           | Of the components you chose above, which do you find most useful?                          |                             |                           |                               |                                         |
| <b>3.</b> | Which parts of the MfM application were difficult?<br>(Circle all that apply)              | <b>Voice</b>                | <b>Pictures</b>           | <b>Size of picture</b>        | <b>Understanding Hindi</b>              |
|           |                                                                                            | <b>Words/Text used</b>      | <b>Size of words/text</b> | <b>Using the mobile phone</b> | <b>Recharging money to mobile phone</b> |
|           |                                                                                            | <b>Charging the battery</b> | <b>Carrying the phone</b> | <b>Typing on the phone</b>    | <b>Submitting the data</b>              |
|           | Of the parts you chose above, which do you find the most difficult?                        |                             |                           |                               |                                         |
| <b>4.</b> | Which parts of the MfM application were easy?<br>(Circle all that apply)                   | <b>Voice</b>                | <b>Pictures</b>           | <b>Size of picture</b>        | <b>Understanding Hindi</b>              |
|           |                                                                                            | <b>Words/Text used</b>      | <b>Size of words/text</b> | <b>Using the mobile phone</b> | <b>Recharging money to mobile phone</b> |
|           |                                                                                            | <b>Charging the battery</b> | <b>Carrying the phone</b> | <b>Typing on the phone</b>    | <b>Submitting the data</b>              |
|           | Of the parts you chose above, which do you find the easiest?                               |                             |                           |                               |                                         |

|     |                                                                                                                                                                                               |                                                                     |                                     |                                                     |                                                                          |                                     |
|-----|-----------------------------------------------------------------------------------------------------------------------------------------------------------------------------------------------|---------------------------------------------------------------------|-------------------------------------|-----------------------------------------------------|--------------------------------------------------------------------------|-------------------------------------|
| 5.  | Which parts of the MfM application are you most satisfied with?<br><br>(Circle a maximum of 3 answers)                                                                                        | <b>Voice</b>                                                        | <b>Pictures</b>                     | <b>Size of picture</b>                              | <b>Understanding Hindi</b>                                               |                                     |
|     |                                                                                                                                                                                               | <b>Words/Text used</b>                                              | <b>Size of words/text</b>           | <b>Using the mobile phone</b>                       | <b>Recharging money to mobile phone</b>                                  |                                     |
|     |                                                                                                                                                                                               | <b>Charging the battery</b>                                         | <b>Carrying the phone</b>           | <b>Typing on the phone</b>                          | <b>Submitting the data</b>                                               |                                     |
| 6.  | Of which services related to MfM offered by NEEDS are you most satisfied with?                                                                                                                | <b>Training</b>                                                     | <b>Monitoring</b>                   | <b>Direct support from fieldworkers</b>             | <b>Support during cluster meetings</b>                                   |                                     |
| 7.  | Who helps you with the MfM application: It can be related to entering data, recharging money on the phone, saving data or submitting the data? (Circle all that apply)                        | <b>Field Workers</b>                                                |                                     | <b>ANM</b>                                          | <b>Other Sahiyyas</b>                                                    |                                     |
|     |                                                                                                                                                                                               | <b>Family</b>                                                       |                                     | <b>Friends</b>                                      | <b>No one</b>                                                            |                                     |
| 8.  | How did MfM affect your work as a Sahiyya? (Circle a maximum of 2 answers)                                                                                                                    | <b>Made me more confident</b>                                       | <b>Made my work more difficult</b>  | <b>Helped me work better</b>                        | <b>Increased my workload</b>                                             | <b>Had no effect</b>                |
| 9.  | What motivates you most in continuously using MfM? (Circle a maximum of 3 answers)                                                                                                            | <b>Made my work more efficient</b>                                  |                                     | <b>Made me happier in my work</b>                   |                                                                          | <b>Made me more knowledgeable</b>   |
|     |                                                                                                                                                                                               | <b>Increased incentives</b>                                         | <b>Respect from women/villagers</b> |                                                     | <b>Respect from ANM</b>                                                  | <b>I don't use MfM continuously</b> |
| 10. | How did MfM affect the way you educate women about maternal health in your village?                                                                                                           | <b>Educating women became easier for me</b>                         |                                     | <b>Educating women became more difficult for me</b> |                                                                          | <b>Had no effect</b>                |
| 11. | How did MfM affect your relationship with mothers and pregnant women in your village?                                                                                                         | <b>Most women trust me and follow my instructions more</b>          |                                     |                                                     | <b>Most women trust me more, but still do not follow my instructions</b> |                                     |
|     |                                                                                                                                                                                               | <b>Most women do not trust me and do not follow my instructions</b> |                                     |                                                     | <b>Had no effect</b>                                                     |                                     |
| 12. | If you compare the current situation with the previous situation of maternal health before MfM, have you noticed any improvement in the health of mothers and pregnant women in your village? |                                                                     |                                     |                                                     | <b>Yes</b>                                                               | <b>No</b>                           |
| 13. | In general, are you satisfied with using MfM?                                                                                                                                                 |                                                                     |                                     |                                                     | <b>Yes</b>                                                               | <b>No</b>                           |
| 14. | Would you recommend MfM to other Sahiyyas who still do not have MfM?                                                                                                                          |                                                                     |                                     |                                                     | <b>Yes</b>                                                               | <b>No</b>                           |
