# Supplementary material for: “I am not telling. The mobile is telling”: Factors influencing the outcomes of a community health worker mHealth intervention in India
Source: PubMed Central journal article supplement (PMC5870994; doi:10.1371/journal.pone.0194927), 2018-03-27
Supplement: pone.0194927.s002.pdf [file pone.0194927.s002.pdf]

**Baseline HH questionnaire**

*For Research Purpose only*

ID Code

***Baseline Survey on***  
**“Mobile for Mother”**

**Household Questionnaire**

# Baseline HH questionnaire

## CONSENT FORM

Namaste. My name is \_\_\_\_\_ and I am working with NEEDS. We are conducting a survey about the health of women and use of health facilities. We would very much appreciate the participation of your household in this survey.

I would like to ask you some questions about your household. The survey usually takes about 20 minutes to complete. Whatever information you provide will be kept strictly confidential. Participation in this survey is voluntary and you can choose not to answer any question or all of the questions. However, we hope that you will participate in this survey since your participation is important. At this time, do you want to ask me anything about the survey?

ANSWER ANY QUESTIONS AND ADDRESS RESPONDENT'S CONCERNS.

In case you need more information about the survey, you may contact Mr. Murari Chowdhary. (GIVE CARD WITH CONTACT INFORMATION)

May I begin the interview now?      Yes----1      No-----2

Signature of interviewer:

Date:

Consent                                  YES / NO          (Please circle)

RESPONDENT AGREES FOR INTERVIEW.....1  
AGREE FOR

RESPONDENT DOES NOT  
INTERVIEW.....2 →

END

### Section . Identification Information

|                               |                                              |                                                                                                                                                                         |
|-------------------------------|----------------------------------------------|-------------------------------------------------------------------------------------------------------------------------------------------------------------------------|
| 101.                          | Name of the Respondent<br>mÛkjnkrk dk uke    |                                                                                                                                                                         |
| 102.                          | Household Address<br><b>?kj dk irk</b>       | _____ No. <input type="text"/> <input type="text"/> <input type="text"/>                                                                                                |
| 103.                          | Village Name <b>xzke</b>                     | _____ No. <input type="text"/> <input type="text"/>                                                                                                                     |
| 104.                          | Main village or hamlet<br>eq[; xzke ;k Vksyk | Main village.....1<br>Hamlet.....2<br>(Name.....)                                                                                                                       |
| 105                           | How many months ago was your last delivery?  | No. <input type="text"/> <input type="text"/>                                                                                                                           |
| 106.                          | Sub-centre Name <b>miLokLF; dsUnz</b>        | _____ No. <input type="text"/> <input type="text"/>                                                                                                                     |
| 107. Interviewer<br>Signature | <br><br>lk{kkRdkj drkZ<br>_____              | 108. Date<br><br><input type="text"/> <input type="text"/> / <input type="text"/> <input type="text"/> / <input type="text"/> <input type="text"/> <input type="text"/> |
| 109. Supervisors<br>signature | <br><br>i;Zos{k<br>_____                     | 110. Date<br><br><input type="text"/> <input type="text"/> / <input type="text"/> <input type="text"/> / <input type="text"/> <input type="text"/> <input type="text"/> |

**Baseline HH questionnaire**

|                          |                      |   |
|--------------------------|----------------------|---|
| 111. Result Code         | lk{kkRdkj dk ifj.kke | □ |
| 112. Total No. of visits |                      | □ |

(Result codes)  
 1. Completed; 2. Completed after revisit, 3. Refused; 4. Respondent/Entire household Absent; 5. Incomplete;  
 6. Other ----- (Specify)

|      |                                                                                                                                                                                   |                                                                                                                |
|------|-----------------------------------------------------------------------------------------------------------------------------------------------------------------------------------|----------------------------------------------------------------------------------------------------------------|
| 201. | Since how long you are living in this area?<br><b>vkj ;gk; dc ls jg jgs gS \</b>                                                                                                  | ----- Years                                                                                                    |
| 202. | <b>vkidk /keZ D;k gS \</b><br>What is the your religion?                                                                                                                          | Hindu .....1<br>Muslim .....2<br>Christian .....3<br>Sikhism .....4<br>Sarna .....5<br>Others (specify) .....9 |
| 203. | <b>D;k vki vuqlwfr tkfr] tutkfr ;k vU; finM+h tkfr ds gSa ;k buesa ls dksbZ ugha gSA</b><br>Does the respondent belongs to scheduled caste, scheduled tribe, OBC or none of them? | SC .....1<br>ST .....2<br>OBC .....3<br>Others (Specify) .....9                                                |
| 204. | <b>vkus dkSu lk mPpre ntkZ ikl fd;k gS \</b><br>Which is the last class/ standard you attended?<br>(Record exact class)                                                           | Grade ..... □ □                                                                                                |
| 205. | <b>vkids ifr us dkSu lk mPpre ntkZ ikl fd;k gS \</b><br>Which is the last class/ standard your spouse attended? (Record exact class)                                              | Grade ..... □ □                                                                                                |
| 206. | <b>vkidk eq; O;olk; D;k gS \</b><br>What is your primary occupation?<br><b>mi;qDr dksM ns[kdj Hkjasas</b>                                                                         | _____ □                                                                                                        |
| 207. | <b>vkids ifr dk eq; O;olk; D;k gS \</b><br>What is the primary occupation of your husband?<br><b>mi;qDr dksM ns[kdj Hkjasas</b>                                                   | _____ □                                                                                                        |
| 208. | <b>vkj vius finys tUefnu ij fdrus o"kZ ds Fksa \</b><br>How old were you at the time of your last birthday? (Record in years)                                                     | □ □                                                                                                            |
| 209. | <b>'kknh ds le; vkidh mez D;k Fkh \</b><br>What was your age at the time of your (first) marriage? (Record in years)                                                              | □ □                                                                                                            |
| 210. | <b>igys xHkZ/kkj.k ds le; vkidh mez D;k Fkh \</b><br>What was your age at the time of your (first) pregnancy? (Record in years)                                                   | □ □                                                                                                            |
| 211. | <b>vafre xHkZ/kkj.k djus ds le; vkidh mez D;k Fkh \</b><br>What was your age at the time of your last pregnancy? (Record in years)                                                | □ □                                                                                                            |

212. Have you ever heard about the following: (Knowledge): **D;k vkidks bu ckrksa ds ckjs esa tkudkj gS \**

| Components | Source of information (multiple possible) (Use codes) |
|------------|-------------------------------------------------------|
|            |                                                       |

**Baseline HH questionnaire**

|                                                                                   |                                                                                                                                  |       |      |                                                                                                                                                                                                                                                                                                                                                                                                                                                                                                                                                                                                                                                                                                                                                                                                      |  |                                                           |  |                                        |  |                                         |  |                                     |  |                   |                                                |  |
|-----------------------------------------------------------------------------------|----------------------------------------------------------------------------------------------------------------------------------|-------|------|------------------------------------------------------------------------------------------------------------------------------------------------------------------------------------------------------------------------------------------------------------------------------------------------------------------------------------------------------------------------------------------------------------------------------------------------------------------------------------------------------------------------------------------------------------------------------------------------------------------------------------------------------------------------------------------------------------------------------------------------------------------------------------------------------|--|-----------------------------------------------------------|--|----------------------------------------|--|-----------------------------------------|--|-------------------------------------|--|-------------------|------------------------------------------------|--|
| <p>212 A. Do you know why you need to visit ANM/doctor during your pregnancy?</p> | <table border="1"> <tr> <td data-bbox="778 163 890 197">1 YES</td> <td data-bbox="890 163 1002 197">2 NO</td> </tr> </table>     | 1 YES | 2 NO | <p>If Yes, ask why?</p> <table border="1"> <tr> <td data-bbox="1123 181 1171 315"></td> <td data-bbox="1171 181 1428 315">Helps to identify (severe) problems and provide solutions</td> </tr> <tr> <td data-bbox="1123 315 1171 383"></td> <td data-bbox="1171 315 1428 383">It will minimize risks</td> </tr> <tr> <td data-bbox="1123 383 1171 450"></td> <td data-bbox="1171 383 1428 450">Receive additional services (TT, iron)</td> </tr> <tr> <td data-bbox="1123 450 1171 517"></td> <td data-bbox="1171 450 1428 517">Other (correct answers)</td> </tr> <tr> <td data-bbox="1123 517 1171 573"></td> <td data-bbox="1171 517 1428 573">No correct answer</td> </tr> <tr> <td colspan="2" data-bbox="1123 573 1428 712">(respondent needs to give spontaneous answers)</td> </tr> </table> |  | Helps to identify (severe) problems and provide solutions |  | It will minimize risks                 |  | Receive additional services (TT, iron)  |  | Other (correct answers)             |  | No correct answer | (respondent needs to give spontaneous answers) |  |
| 1 YES                                                                             | 2 NO                                                                                                                             |       |      |                                                                                                                                                                                                                                                                                                                                                                                                                                                                                                                                                                                                                                                                                                                                                                                                      |  |                                                           |  |                                        |  |                                         |  |                                     |  |                   |                                                |  |
|                                                                                   | Helps to identify (severe) problems and provide solutions                                                                        |       |      |                                                                                                                                                                                                                                                                                                                                                                                                                                                                                                                                                                                                                                                                                                                                                                                                      |  |                                                           |  |                                        |  |                                         |  |                                     |  |                   |                                                |  |
|                                                                                   | It will minimize risks                                                                                                           |       |      |                                                                                                                                                                                                                                                                                                                                                                                                                                                                                                                                                                                                                                                                                                                                                                                                      |  |                                                           |  |                                        |  |                                         |  |                                     |  |                   |                                                |  |
|                                                                                   | Receive additional services (TT, iron)                                                                                           |       |      |                                                                                                                                                                                                                                                                                                                                                                                                                                                                                                                                                                                                                                                                                                                                                                                                      |  |                                                           |  |                                        |  |                                         |  |                                     |  |                   |                                                |  |
|                                                                                   | Other (correct answers)                                                                                                          |       |      |                                                                                                                                                                                                                                                                                                                                                                                                                                                                                                                                                                                                                                                                                                                                                                                                      |  |                                                           |  |                                        |  |                                         |  |                                     |  |                   |                                                |  |
|                                                                                   | No correct answer                                                                                                                |       |      |                                                                                                                                                                                                                                                                                                                                                                                                                                                                                                                                                                                                                                                                                                                                                                                                      |  |                                                           |  |                                        |  |                                         |  |                                     |  |                   |                                                |  |
| (respondent needs to give spontaneous answers)                                    |                                                                                                                                  |       |      |                                                                                                                                                                                                                                                                                                                                                                                                                                                                                                                                                                                                                                                                                                                                                                                                      |  |                                                           |  |                                        |  |                                         |  |                                     |  |                   |                                                |  |
| <p>212 B. Do you know why you need to take TT injection?</p>                      | <table border="1"> <tr> <td data-bbox="778 745 890 779">1 YES</td> <td data-bbox="890 745 1002 779">2 NO</td> </tr> </table>     | 1 YES | 2 NO | <p>If yes, ask why</p> <table border="1"> <tr> <td data-bbox="1123 763 1171 831"></td> <td data-bbox="1171 763 1428 831">It will protect the baby from tetanus</td> </tr> <tr> <td data-bbox="1123 831 1171 887"></td> <td data-bbox="1171 831 1428 887">No correct answer</td> </tr> <tr> <td colspan="2" data-bbox="1123 887 1428 992"></td> </tr> </table>                                                                                                                                                                                                                                                                                                                                                                                                                                        |  | It will protect the baby from tetanus                     |  | No correct answer                      |  |                                         |  |                                     |  |                   |                                                |  |
| 1 YES                                                                             | 2 NO                                                                                                                             |       |      |                                                                                                                                                                                                                                                                                                                                                                                                                                                                                                                                                                                                                                                                                                                                                                                                      |  |                                                           |  |                                        |  |                                         |  |                                     |  |                   |                                                |  |
|                                                                                   | It will protect the baby from tetanus                                                                                            |       |      |                                                                                                                                                                                                                                                                                                                                                                                                                                                                                                                                                                                                                                                                                                                                                                                                      |  |                                                           |  |                                        |  |                                         |  |                                     |  |                   |                                                |  |
|                                                                                   | No correct answer                                                                                                                |       |      |                                                                                                                                                                                                                                                                                                                                                                                                                                                                                                                                                                                                                                                                                                                                                                                                      |  |                                                           |  |                                        |  |                                         |  |                                     |  |                   |                                                |  |
|                                                                                   |                                                                                                                                  |       |      |                                                                                                                                                                                                                                                                                                                                                                                                                                                                                                                                                                                                                                                                                                                                                                                                      |  |                                                           |  |                                        |  |                                         |  |                                     |  |                   |                                                |  |
| <p>212 C. Do you know why you need to IFA (iron) tables</p>                       | <table border="1"> <tr> <td data-bbox="778 1003 890 1037">1 YES</td> <td data-bbox="890 1003 1002 1037">2 NO</td> </tr> </table> | 1 YES | 2 NO | <p>If yes, ask why</p> <table border="1"> <tr> <td data-bbox="1123 1043 1171 1144"></td> <td data-bbox="1171 1043 1428 1144">It increases blood and will protect from anemia</td> </tr> <tr> <td data-bbox="1123 1144 1171 1200"></td> <td data-bbox="1171 1144 1428 1200">No correct answer</td> </tr> </table>                                                                                                                                                                                                                                                                                                                                                                                                                                                                                     |  | It increases blood and will protect from anemia           |  | No correct answer                      |  |                                         |  |                                     |  |                   |                                                |  |
| 1 YES                                                                             | 2 NO                                                                                                                             |       |      |                                                                                                                                                                                                                                                                                                                                                                                                                                                                                                                                                                                                                                                                                                                                                                                                      |  |                                                           |  |                                        |  |                                         |  |                                     |  |                   |                                                |  |
|                                                                                   | It increases blood and will protect from anemia                                                                                  |       |      |                                                                                                                                                                                                                                                                                                                                                                                                                                                                                                                                                                                                                                                                                                                                                                                                      |  |                                                           |  |                                        |  |                                         |  |                                     |  |                   |                                                |  |
|                                                                                   | No correct answer                                                                                                                |       |      |                                                                                                                                                                                                                                                                                                                                                                                                                                                                                                                                                                                                                                                                                                                                                                                                      |  |                                                           |  |                                        |  |                                         |  |                                     |  |                   |                                                |  |
| <p>212 D. Do you know the danger signs in pregnancy?</p>                          | <table border="1"> <tr> <td data-bbox="778 1216 890 1249">1 YES</td> <td data-bbox="890 1216 1002 1249">2 NO</td> </tr> </table> | 1 YES | 2 NO | <p>If Yes, mention all</p> <table border="1"> <tr> <td data-bbox="1123 1256 1171 1357"></td> <td data-bbox="1171 1256 1428 1357">Bleeding from vagina during pregnancy</td> </tr> <tr> <td data-bbox="1123 1357 1171 1458"></td> <td data-bbox="1171 1357 1428 1458">Severe abdominal pain during pregnancy</td> </tr> <tr> <td data-bbox="1123 1458 1171 1559"></td> <td data-bbox="1171 1458 1428 1559">Severe headache with blurring of vision</td> </tr> <tr> <td data-bbox="1123 1559 1171 1659"></td> <td data-bbox="1171 1559 1428 1659">Convulsions / loss of Consciousness</td> </tr> <tr> <td data-bbox="1123 1659 1171 1693"></td> <td data-bbox="1171 1659 1428 1693">No correct answer</td> </tr> <tr> <td colspan="2" data-bbox="1123 1693 1428 1787">mention</td> </tr> </table>      |  | Bleeding from vagina during pregnancy                     |  | Severe abdominal pain during pregnancy |  | Severe headache with blurring of vision |  | Convulsions / loss of Consciousness |  | No correct answer | mention                                        |  |
| 1 YES                                                                             | 2 NO                                                                                                                             |       |      |                                                                                                                                                                                                                                                                                                                                                                                                                                                                                                                                                                                                                                                                                                                                                                                                      |  |                                                           |  |                                        |  |                                         |  |                                     |  |                   |                                                |  |
|                                                                                   | Bleeding from vagina during pregnancy                                                                                            |       |      |                                                                                                                                                                                                                                                                                                                                                                                                                                                                                                                                                                                                                                                                                                                                                                                                      |  |                                                           |  |                                        |  |                                         |  |                                     |  |                   |                                                |  |
|                                                                                   | Severe abdominal pain during pregnancy                                                                                           |       |      |                                                                                                                                                                                                                                                                                                                                                                                                                                                                                                                                                                                                                                                                                                                                                                                                      |  |                                                           |  |                                        |  |                                         |  |                                     |  |                   |                                                |  |
|                                                                                   | Severe headache with blurring of vision                                                                                          |       |      |                                                                                                                                                                                                                                                                                                                                                                                                                                                                                                                                                                                                                                                                                                                                                                                                      |  |                                                           |  |                                        |  |                                         |  |                                     |  |                   |                                                |  |
|                                                                                   | Convulsions / loss of Consciousness                                                                                              |       |      |                                                                                                                                                                                                                                                                                                                                                                                                                                                                                                                                                                                                                                                                                                                                                                                                      |  |                                                           |  |                                        |  |                                         |  |                                     |  |                   |                                                |  |
|                                                                                   | No correct answer                                                                                                                |       |      |                                                                                                                                                                                                                                                                                                                                                                                                                                                                                                                                                                                                                                                                                                                                                                                                      |  |                                                           |  |                                        |  |                                         |  |                                     |  |                   |                                                |  |
| mention                                                                           |                                                                                                                                  |       |      |                                                                                                                                                                                                                                                                                                                                                                                                                                                                                                                                                                                                                                                                                                                                                                                                      |  |                                                           |  |                                        |  |                                         |  |                                     |  |                   |                                                |  |

**Baseline HH questionnaire**

|                                                                                                                                                                                                                                                                                                                                              |                                                                          |      |                                                                                                                                                                                                                                                                                                                                                                                                                                                                                                                                                                                                                                                                                                                                                       |        |                                                                        |  |                              |  |                               |  |                                                                          |  |                   |
|----------------------------------------------------------------------------------------------------------------------------------------------------------------------------------------------------------------------------------------------------------------------------------------------------------------------------------------------|--------------------------------------------------------------------------|------|-------------------------------------------------------------------------------------------------------------------------------------------------------------------------------------------------------------------------------------------------------------------------------------------------------------------------------------------------------------------------------------------------------------------------------------------------------------------------------------------------------------------------------------------------------------------------------------------------------------------------------------------------------------------------------------------------------------------------------------------------------|--------|------------------------------------------------------------------------|--|------------------------------|--|-------------------------------|--|--------------------------------------------------------------------------|--|-------------------|
| <p>212 E. Do you know the danger signs during labour/ delivery?</p>                                                                                                                                                                                                                                                                          | 1 YES                                                                    | 2 NO | <p>If Yes, mention all</p> <table border="1"> <tr> <td data-bbox="1118 174 1174 344"></td> <td data-bbox="1174 174 1426 344">If the membranes/ water is broken/coming out before the expected date.</td> </tr> <tr> <td data-bbox="1118 344 1174 416"></td> <td data-bbox="1174 344 1426 416">It the women has convulsions</td> </tr> <tr> <td data-bbox="1118 416 1174 488"></td> <td data-bbox="1174 416 1426 488">Labour for more then 12 hours</td> </tr> <tr> <td data-bbox="1118 488 1174 622"></td> <td data-bbox="1174 488 1426 622">Placenta does not come out within 30 minutes after the baby is delivered</td> </tr> <tr> <td data-bbox="1118 622 1174 680"></td> <td data-bbox="1174 622 1426 680">No correct answer</td> </tr> </table> |        | If the membranes/ water is broken/coming out before the expected date. |  | It the women has convulsions |  | Labour for more then 12 hours |  | Placenta does not come out within 30 minutes after the baby is delivered |  | No correct answer |
|                                                                                                                                                                                                                                                                                                                                              | If the membranes/ water is broken/coming out before the expected date.   |      |                                                                                                                                                                                                                                                                                                                                                                                                                                                                                                                                                                                                                                                                                                                                                       |        |                                                                        |  |                              |  |                               |  |                                                                          |  |                   |
|                                                                                                                                                                                                                                                                                                                                              | It the women has convulsions                                             |      |                                                                                                                                                                                                                                                                                                                                                                                                                                                                                                                                                                                                                                                                                                                                                       |        |                                                                        |  |                              |  |                               |  |                                                                          |  |                   |
|                                                                                                                                                                                                                                                                                                                                              | Labour for more then 12 hours                                            |      |                                                                                                                                                                                                                                                                                                                                                                                                                                                                                                                                                                                                                                                                                                                                                       |        |                                                                        |  |                              |  |                               |  |                                                                          |  |                   |
|                                                                                                                                                                                                                                                                                                                                              | Placenta does not come out within 30 minutes after the baby is delivered |      |                                                                                                                                                                                                                                                                                                                                                                                                                                                                                                                                                                                                                                                                                                                                                       |        |                                                                        |  |                              |  |                               |  |                                                                          |  |                   |
|                                                                                                                                                                                                                                                                                                                                              | No correct answer                                                        |      |                                                                                                                                                                                                                                                                                                                                                                                                                                                                                                                                                                                                                                                                                                                                                       |        |                                                                        |  |                              |  |                               |  |                                                                          |  |                   |
| <p>212F Do you know why 5 cleans are important during delivery?</p>                                                                                                                                                                                                                                                                          | 1 YES                                                                    | 2 NO | <p>If yes, ask why</p> <table border="1"> <tr> <td data-bbox="1118 824 1174 936"></td> <td data-bbox="1174 824 1426 936">It limites infection (and death) both in baby an mother</td> </tr> <tr> <td data-bbox="1118 936 1174 994"></td> <td data-bbox="1174 936 1426 994">No correct answer</td> </tr> </table>                                                                                                                                                                                                                                                                                                                                                                                                                                      |        | It limites infection (and death) both in baby an mother                |  | No correct answer            |  |                               |  |                                                                          |  |                   |
|                                                                                                                                                                                                                                                                                                                                              | It limites infection (and death) both in baby an mother                  |      |                                                                                                                                                                                                                                                                                                                                                                                                                                                                                                                                                                                                                                                                                                                                                       |        |                                                                        |  |                              |  |                               |  |                                                                          |  |                   |
|                                                                                                                                                                                                                                                                                                                                              | No correct answer                                                        |      |                                                                                                                                                                                                                                                                                                                                                                                                                                                                                                                                                                                                                                                                                                                                                       |        |                                                                        |  |                              |  |                               |  |                                                                          |  |                   |
| <p>212 G. ANC care: IkzloiqoZ ns[kHkky</p> <ol style="list-style-type: none"> <li>1. Antenatal checkups are important<br/>IkzloiqoZ tk;ip egRoiq.kZ gS A</li> <li>2. Iron folic tablets<br/>vk;j.k dh xksfy;kj</li> <li>3. TT injection<br/>Vh Vh dh lqbZ</li> <li>4. Danger sign of pregnancy<br/>Ikzlo ds nkSjku [krjs ds ladsr</li> </ol> |                                                                          |      | <table border="1"> <tr> <td data-bbox="1118 1077 1302 1135">Source</td> </tr> <tr> <td data-bbox="1118 1135 1302 1193"></td> </tr> <tr> <td data-bbox="1118 1193 1302 1252"></td> </tr> <tr> <td data-bbox="1118 1252 1302 1310"></td> </tr> <tr> <td data-bbox="1118 1310 1302 1368"></td> </tr> </table>                                                                                                                                                                                                                                                                                                                                                                                                                                            | Source |                                                                        |  |                              |  |                               |  |                                                                          |  |                   |
| Source                                                                                                                                                                                                                                                                                                                                       |                                                                          |      |                                                                                                                                                                                                                                                                                                                                                                                                                                                                                                                                                                                                                                                                                                                                                       |        |                                                                        |  |                              |  |                               |  |                                                                          |  |                   |
|                                                                                                                                                                                                                                                                                                                                              |                                                                          |      |                                                                                                                                                                                                                                                                                                                                                                                                                                                                                                                                                                                                                                                                                                                                                       |        |                                                                        |  |                              |  |                               |  |                                                                          |  |                   |
|                                                                                                                                                                                                                                                                                                                                              |                                                                          |      |                                                                                                                                                                                                                                                                                                                                                                                                                                                                                                                                                                                                                                                                                                                                                       |        |                                                                        |  |                              |  |                               |  |                                                                          |  |                   |
|                                                                                                                                                                                                                                                                                                                                              |                                                                          |      |                                                                                                                                                                                                                                                                                                                                                                                                                                                                                                                                                                                                                                                                                                                                                       |        |                                                                        |  |                              |  |                               |  |                                                                          |  |                   |
|                                                                                                                                                                                                                                                                                                                                              |                                                                          |      |                                                                                                                                                                                                                                                                                                                                                                                                                                                                                                                                                                                                                                                                                                                                                       |        |                                                                        |  |                              |  |                               |  |                                                                          |  |                   |
| <p>212 H. Delivery care</p> <ol style="list-style-type: none"> <li>1. Five Cleans<br/>Ikj;kp lQkbZ</li> </ol>                                                                                                                                                                                                                                | 1                                                                        | 2    |                                                                                                                                                                                                                                                                                                                                                                                                                                                                                                                                                                                                                                                                                                                                                       |        |                                                                        |  |                              |  |                               |  |                                                                          |  |                   |
| <p>212 I. RTI/STI</p>                                                                                                                                                                                                                                                                                                                        | 1                                                                        | 2    |                                                                                                                                                                                                                                                                                                                                                                                                                                                                                                                                                                                                                                                                                                                                                       |        |                                                                        |  |                              |  |                               |  |                                                                          |  |                   |
| <p>212 J. HIV/AIDS</p>                                                                                                                                                                                                                                                                                                                       | 1                                                                        | 2    |                                                                                                                                                                                                                                                                                                                                                                                                                                                                                                                                                                                                                                                                                                                                                       |        |                                                                        |  |                              |  |                               |  |                                                                          |  |                   |
| <p>Codes for source of information: Any health professional-1 ; Newspaper/Magazine-2, Television-3, Radio-4; NGO worker-5; Husband-6. Sahiyya- 7; Friends-8; Other- 9</p>                                                                                                                                                                    |                                                                          |      |                                                                                                                                                                                                                                                                                                                                                                                                                                                                                                                                                                                                                                                                                                                                                       |        |                                                                        |  |                              |  |                               |  |                                                                          |  |                   |

Baseline HH questionnaire

| Section. Reproduction (Pregnancy History): |                                                             |                                                               |                                                                                                    |                                                                                                                          |        |      |
|--------------------------------------------|-------------------------------------------------------------|---------------------------------------------------------------|----------------------------------------------------------------------------------------------------|--------------------------------------------------------------------------------------------------------------------------|--------|------|
| 301.                                       | Information about obstetric history (first pregnancy first) |                                                               |                                                                                                    |                                                                                                                          |        |      |
|                                            | Pregnancy                                                   | Alive (A)/<br>Abortion or<br>Still birth<br>(AS)/ Died<br>(D) | If 'AS'<br>If not alive during<br>pregnancy, after<br>how many months<br>did the pregnancy<br>end? | If born alive but not alive now,<br>when did the baby die?<br>(1) < 6 weeks<br>(2) >6 weeks but < 1 year<br>(3) > 1 year | Female | Male |
|                                            | 1                                                           |                                                               |                                                                                                    |                                                                                                                          |        |      |
|                                            | 2                                                           |                                                               |                                                                                                    |                                                                                                                          |        |      |
|                                            | 3                                                           |                                                               |                                                                                                    |                                                                                                                          |        |      |
|                                            | 4                                                           |                                                               |                                                                                                    |                                                                                                                          |        |      |
|                                            | 5                                                           |                                                               |                                                                                                    |                                                                                                                          |        |      |
|                                            | 6                                                           |                                                               |                                                                                                    |                                                                                                                          |        |      |
|                                            | 7                                                           |                                                               |                                                                                                    |                                                                                                                          |        |      |
| 8                                          |                                                             |                                                               |                                                                                                    |                                                                                                                          |        |      |

|     |                                                                                                                                                |                                                           |
|-----|------------------------------------------------------------------------------------------------------------------------------------------------|-----------------------------------------------------------|
| 302 | If given a choice, how many children would you like to have in your life?<br><b>vxj vkidh bPNk ij fuHkZj gks rks vki fdrus cPps pkgsaxha \</b> | Number _____ <input type="text"/><br>Other------(Specify) |
|-----|------------------------------------------------------------------------------------------------------------------------------------------------|-----------------------------------------------------------|

| Now I want to talk about your most recent pregnancy ( that ended in a live birth within the last 12 months. |                                                                                                                                                                                        |                                                                                                                                                                                          |
|-------------------------------------------------------------------------------------------------------------|----------------------------------------------------------------------------------------------------------------------------------------------------------------------------------------|------------------------------------------------------------------------------------------------------------------------------------------------------------------------------------------|
| 401                                                                                                         | <b>Was this pregnancy planned?</b>                                                                                                                                                     | Yes .....1<br>No .....2                                                                                                                                                                  |
| 402                                                                                                         | <b>(Ukke) -----ds le; tc vki xHkZorh Fkha rc Dk vki izloiwoZ tkap ds fy, xbZ Fkh \</b><br>When you were pregnant with your youngest child, did you go for an antenatal check-up?       | Yes .....1<br>No .....2<br>(skip to 407)                                                                                                                                                 |
| 403                                                                                                         | <b>vkius fdldks fn[kk;k \ fdlh vkSj dks \</b><br>Whom did you see at the time of first antenatal check up?                                                                             | Doctor .....1<br>ANM .....2<br>Nurse/Midwife/ LHV .....3<br>Other health professional .....4<br>Traditional birth attendant (DAI) .....5<br>Sahiyya.....6<br>Other .....(specify) .....9 |
| 404                                                                                                         | <b>vkius fdlh vkSj dks fn[kk;k D;k \ (iwjh xHkkZoLFkk ds nkSjku</b><br>Who else did you see during the entire period of pregnancy?<br><br>Anyone else?<br><br>Record all persons seen. | Doctor .....A<br>ANM .....B<br>Nurse/Midwife/ LHV .....C<br>Other health professional .....D<br>Traditional birth attendant (DAI) .....E<br>Sahiyya.....F<br>No one.....G                |

Baseline HH questionnaire

|                             |                                                                                                                                                                                                                                                                                                          |                                                                                                                                                                                                                                                                                                                                                                                                                                                                                                                                                                                                                                                                                                                                                                                             |                             |
|-----------------------------|----------------------------------------------------------------------------------------------------------------------------------------------------------------------------------------------------------------------------------------------------------------------------------------------------------|---------------------------------------------------------------------------------------------------------------------------------------------------------------------------------------------------------------------------------------------------------------------------------------------------------------------------------------------------------------------------------------------------------------------------------------------------------------------------------------------------------------------------------------------------------------------------------------------------------------------------------------------------------------------------------------------------------------------------------------------------------------------------------------------|-----------------------------|
|                             |                                                                                                                                                                                                                                                                                                          | Other .....(specify) .....X                                                                                                                                                                                                                                                                                                                                                                                                                                                                                                                                                                                                                                                                                                                                                                 |                             |
| 405                         | <b>tc vki xHkZorh Fkh tc igyh ckj tk;p ds fy, igyh ckj izloiwoZ ;s ns[kus xbZ Fkh fd lc Bhd&amp;Bkd gS ;k ugha dksbZ leL;k Fkh \</b><br>When you were pregnant with your youngest child, did you go to antenatal care for the first time to check that everything was fine or because you had a problem? | Because of a problem .....1<br>To check only .....2                                                                                                                                                                                                                                                                                                                                                                                                                                                                                                                                                                                                                                                                                                                                         |                             |
| 406                         | <b>izloiwoZ tk;p dk fu.kZ; fdlus fy;k \</b><br>Who mainly made the decision to go for an antenatal check-up?                                                                                                                                                                                             | Respondent .....01<br>Husband .....02<br>In-Laws .....03<br>Parents .....04<br>Sister/Sister-In-Law .....05<br>Other member in husband's family .....06<br>Other member in respondent's family .....07<br>Relatives .....08<br>Friend/Neighbour .....09<br>TBA/Field Worker .....10<br>Other .....(specify) .....99                                                                                                                                                                                                                                                                                                                                                                                                                                                                         |                             |
| 407                         | <b>tc (Ukke) -----ds le; vki xHkZorh Fkh] rc D;k dksbZ LokLF; dk;ZdÜkkZ izloiwoZ tk;p ds fy, vkids ?kj vk;k Fkk \</b><br>When you were pregnant with your youngest child, did any health worker visit you at home for an antenatal check-up with a physical examination?                                 | Yes .....1<br>No .....2                                                                                                                                                                                                                                                                                                                                                                                                                                                                                                                                                                                                                                                                                                                                                                     |                             |
| 408                         | Check 402 and 407:                                                                                                                                                                                                                                                                                       | Yes in either .....1<br>(skip to 410)<br>No in both .....2                                                                                                                                                                                                                                                                                                                                                                                                                                                                                                                                                                                                                                                                                                                                  |                             |
| 409                         | <b>vkidh izloiwoZ tk;p u gksus dk eq[; dkj.k D;k Fkk \</b><br>What is the main reason you did not receive an antenatal check-up?                                                                                                                                                                         | Not necessary ..... 01<br>Not customary ..... 02<br>Cost too much ..... 03<br>Too far/no transportation ..... 04<br>Poor quality service ..... 05<br>No time to go ..... 06<br>Family did not allow ..... 07<br>Lack of knowledge ..... 08<br>No health worker visited ..... 09<br>Nobody to accompany ..... 10<br>Other .....(specify)..... 99                                                                                                                                                                                                                                                                                                                                                                                                                                             |                             |
|                             |                                                                                                                                                                                                                                                                                                          | → <table border="1" style="display: inline-table;"><tr><td><b>Any answer go to 417</b></td></tr></table>                                                                                                                                                                                                                                                                                                                                                                                                                                                                                                                                                                                                                                                                                    | <b>Any answer go to 417</b> |
| <b>Any answer go to 417</b> |                                                                                                                                                                                                                                                                                                          |                                                                                                                                                                                                                                                                                                                                                                                                                                                                                                                                                                                                                                                                                                                                                                                             |                             |
| 410                         | <b>izlo iwoZ tk;p ds le;] D;k vkidks dksbZ dkMZ feyk Fkk \</b> Did you receive any health card at the time of ANC check-up?                                                                                                                                                                              | Yes .....1<br>No .....2<br>(skip to 413)                                                                                                                                                                                                                                                                                                                                                                                                                                                                                                                                                                                                                                                                                                                                                    |                             |
| 411                         | <b>vxj gk;] rks D;k eSa ns[k ldrh gw; \</b><br>If so, may I see it, please?                                                                                                                                                                                                                              | Yes, seen .....1<br>Yes, not seen .....2<br>No card .....3<br>( if 2 or 3, skip to 413)                                                                                                                                                                                                                                                                                                                                                                                                                                                                                                                                                                                                                                                                                                     |                             |
| 412                         | <b>dkMZ ns[kdj Hkjsa</b><br>Enter the following data from the card                                                                                                                                                                                                                                       | Total no. ANC visits: <input style="width: 50px; height: 20px;" type="text"/><br><br>First visit <input style="width: 20px; height: 20px;" type="text"/> / <input style="width: 20px; height: 20px;" type="text"/> / <input style="width: 20px; height: 20px;" type="text"/> <input style="width: 20px; height: 20px;" type="text"/><br><br>Last visit <input style="width: 20px; height: 20px;" type="text"/> / <input style="width: 20px; height: 20px;" type="text"/> / <input style="width: 20px; height: 20px;" type="text"/> <input style="width: 20px; height: 20px;" type="text"/><br><br>IFA tablets (No.) <input style="width: 20px; height: 20px;" type="text"/> <input style="width: 20px; height: 20px;" type="text"/> <input style="width: 20px; height: 20px;" type="text"/> |                             |

Baseline HH questionnaire

|                                               |                                                                                                                                                                                                                                                                             | TT 1<br>□□/□□/□□□□                                                                                                                                                                                                                                                                                                                                                                                                                                                                                                                                                                                                                                                                                                                                                                                                           |           |                  |                              |                       |                               |         |                                 |         |   |                                    |   |   |                                |   |   |                                               |   |   |                     |   |   |                        |   |   |                                       |   |   |                           |   |   |                            |   |   |
|-----------------------------------------------|-----------------------------------------------------------------------------------------------------------------------------------------------------------------------------------------------------------------------------------------------------------------------------|------------------------------------------------------------------------------------------------------------------------------------------------------------------------------------------------------------------------------------------------------------------------------------------------------------------------------------------------------------------------------------------------------------------------------------------------------------------------------------------------------------------------------------------------------------------------------------------------------------------------------------------------------------------------------------------------------------------------------------------------------------------------------------------------------------------------------|-----------|------------------|------------------------------|-----------------------|-------------------------------|---------|---------------------------------|---------|---|------------------------------------|---|---|--------------------------------|---|---|-----------------------------------------------|---|---|---------------------|---|---|------------------------|---|---|---------------------------------------|---|---|---------------------------|---|---|----------------------------|---|---|
|                                               |                                                                                                                                                                                                                                                                             | TT2<br>□□/□□/□□□□                                                                                                                                                                                                                                                                                                                                                                                                                                                                                                                                                                                                                                                                                                                                                                                                            |           |                  |                              |                       |                               |         |                                 |         |   |                                    |   |   |                                |   |   |                                               |   |   |                     |   |   |                        |   |   |                                       |   |   |                           |   |   |                            |   |   |
| 413.                                          | <p><b>bl xHkkZoLFkk ds nkSjku vkidh fdruh ckj izloiwoZ tk;p dh xbZ \</b><br/>How many times did you receive antenatal check-ups during this pregnancy?</p>                                                                                                                  | <p>TOTAL ANC Check ups ..... □</p> <p>Do you remember approximately when they took place?</p> <table> <tr> <td>Trimester</td> <td>No. of check ups</td> </tr> <tr> <td>1<sup>st</sup> (0-3 months)</td> <td>..... □</td> </tr> <tr> <td>2<sup>nd</sup> (4 –6 months)</td> <td>..... □</td> </tr> <tr> <td>3<sup>rd</sup> (7-9 months)</td> <td>..... □</td> </tr> </table>                                                                                                                                                                                                                                                                                                                                                                                                                                                   | Trimester | No. of check ups | 1 <sup>st</sup> (0-3 months) | ..... □               | 2 <sup>nd</sup> (4 –6 months) | ..... □ | 3 <sup>rd</sup> (7-9 months)    | ..... □ |   |                                    |   |   |                                |   |   |                                               |   |   |                     |   |   |                        |   |   |                                       |   |   |                           |   |   |                            |   |   |
| Trimester                                     | No. of check ups                                                                                                                                                                                                                                                            |                                                                                                                                                                                                                                                                                                                                                                                                                                                                                                                                                                                                                                                                                                                                                                                                                              |           |                  |                              |                       |                               |         |                                 |         |   |                                    |   |   |                                |   |   |                                               |   |   |                     |   |   |                        |   |   |                                       |   |   |                           |   |   |                            |   |   |
| 1 <sup>st</sup> (0-3 months)                  | ..... □                                                                                                                                                                                                                                                                     |                                                                                                                                                                                                                                                                                                                                                                                                                                                                                                                                                                                                                                                                                                                                                                                                                              |           |                  |                              |                       |                               |         |                                 |         |   |                                    |   |   |                                |   |   |                                               |   |   |                     |   |   |                        |   |   |                                       |   |   |                           |   |   |                            |   |   |
| 2 <sup>nd</sup> (4 –6 months)                 | ..... □                                                                                                                                                                                                                                                                     |                                                                                                                                                                                                                                                                                                                                                                                                                                                                                                                                                                                                                                                                                                                                                                                                                              |           |                  |                              |                       |                               |         |                                 |         |   |                                    |   |   |                                |   |   |                                               |   |   |                     |   |   |                        |   |   |                                       |   |   |                           |   |   |                            |   |   |
| 3 <sup>rd</sup> (7-9 months)                  | ..... □                                                                                                                                                                                                                                                                     |                                                                                                                                                                                                                                                                                                                                                                                                                                                                                                                                                                                                                                                                                                                                                                                                                              |           |                  |                              |                       |                               |         |                                 |         |   |                                    |   |   |                                |   |   |                                               |   |   |                     |   |   |                        |   |   |                                       |   |   |                           |   |   |                            |   |   |
| 414.                                          | <p><b>bl xHkkZoLFkk ds nkSjku D;k fdlh Hkh izloiwoZ tk;p ds le; buds fy, de ls de ,d ckj tk;p dh x;h Fkh ?</b><br/>Did you have the following performed at least once during any of your antenatal check-ups?</p>                                                           | <table> <thead> <tr> <th></th> <th>Yes</th> <th>No</th> </tr> </thead> <tbody> <tr> <td>Weight measured .....</td> <td>1</td> <td>2</td> </tr> <tr> <td>Height measured .....</td> <td>1</td> <td>2</td> </tr> <tr> <td>Blood pressure checked .....</td> <td>1</td> <td>2</td> </tr> <tr> <td>Blood test .....</td> <td>1</td> <td>2</td> </tr> <tr> <td>Urine test .....</td> <td>1</td> <td>2</td> </tr> <tr> <td>Internal Exam .....</td> <td>1</td> <td>2</td> </tr> <tr> <td>Abdomen examined .....</td> <td>1</td> <td>2</td> </tr> <tr> <td>X-Ray .....</td> <td>1</td> <td>2</td> </tr> <tr> <td>Sonogram/Ultrasound. ....</td> <td>1</td> <td>2</td> </tr> </tbody> </table>                                                                                                                                       |           | Yes              | No                           | Weight measured ..... | 1                             | 2       | Height measured .....           | 1       | 2 | Blood pressure checked .....       | 1 | 2 | Blood test .....               | 1 | 2 | Urine test .....                              | 1 | 2 | Internal Exam ..... | 1 | 2 | Abdomen examined ..... | 1 | 2 | X-Ray .....                           | 1 | 2 | Sonogram/Ultrasound. .... | 1 | 2 |                            |   |   |
|                                               | Yes                                                                                                                                                                                                                                                                         | No                                                                                                                                                                                                                                                                                                                                                                                                                                                                                                                                                                                                                                                                                                                                                                                                                           |           |                  |                              |                       |                               |         |                                 |         |   |                                    |   |   |                                |   |   |                                               |   |   |                     |   |   |                        |   |   |                                       |   |   |                           |   |   |                            |   |   |
| Weight measured .....                         | 1                                                                                                                                                                                                                                                                           | 2                                                                                                                                                                                                                                                                                                                                                                                                                                                                                                                                                                                                                                                                                                                                                                                                                            |           |                  |                              |                       |                               |         |                                 |         |   |                                    |   |   |                                |   |   |                                               |   |   |                     |   |   |                        |   |   |                                       |   |   |                           |   |   |                            |   |   |
| Height measured .....                         | 1                                                                                                                                                                                                                                                                           | 2                                                                                                                                                                                                                                                                                                                                                                                                                                                                                                                                                                                                                                                                                                                                                                                                                            |           |                  |                              |                       |                               |         |                                 |         |   |                                    |   |   |                                |   |   |                                               |   |   |                     |   |   |                        |   |   |                                       |   |   |                           |   |   |                            |   |   |
| Blood pressure checked .....                  | 1                                                                                                                                                                                                                                                                           | 2                                                                                                                                                                                                                                                                                                                                                                                                                                                                                                                                                                                                                                                                                                                                                                                                                            |           |                  |                              |                       |                               |         |                                 |         |   |                                    |   |   |                                |   |   |                                               |   |   |                     |   |   |                        |   |   |                                       |   |   |                           |   |   |                            |   |   |
| Blood test .....                              | 1                                                                                                                                                                                                                                                                           | 2                                                                                                                                                                                                                                                                                                                                                                                                                                                                                                                                                                                                                                                                                                                                                                                                                            |           |                  |                              |                       |                               |         |                                 |         |   |                                    |   |   |                                |   |   |                                               |   |   |                     |   |   |                        |   |   |                                       |   |   |                           |   |   |                            |   |   |
| Urine test .....                              | 1                                                                                                                                                                                                                                                                           | 2                                                                                                                                                                                                                                                                                                                                                                                                                                                                                                                                                                                                                                                                                                                                                                                                                            |           |                  |                              |                       |                               |         |                                 |         |   |                                    |   |   |                                |   |   |                                               |   |   |                     |   |   |                        |   |   |                                       |   |   |                           |   |   |                            |   |   |
| Internal Exam .....                           | 1                                                                                                                                                                                                                                                                           | 2                                                                                                                                                                                                                                                                                                                                                                                                                                                                                                                                                                                                                                                                                                                                                                                                                            |           |                  |                              |                       |                               |         |                                 |         |   |                                    |   |   |                                |   |   |                                               |   |   |                     |   |   |                        |   |   |                                       |   |   |                           |   |   |                            |   |   |
| Abdomen examined .....                        | 1                                                                                                                                                                                                                                                                           | 2                                                                                                                                                                                                                                                                                                                                                                                                                                                                                                                                                                                                                                                                                                                                                                                                                            |           |                  |                              |                       |                               |         |                                 |         |   |                                    |   |   |                                |   |   |                                               |   |   |                     |   |   |                        |   |   |                                       |   |   |                           |   |   |                            |   |   |
| X-Ray .....                                   | 1                                                                                                                                                                                                                                                                           | 2                                                                                                                                                                                                                                                                                                                                                                                                                                                                                                                                                                                                                                                                                                                                                                                                                            |           |                  |                              |                       |                               |         |                                 |         |   |                                    |   |   |                                |   |   |                                               |   |   |                     |   |   |                        |   |   |                                       |   |   |                           |   |   |                            |   |   |
| Sonogram/Ultrasound. ....                     | 1                                                                                                                                                                                                                                                                           | 2                                                                                                                                                                                                                                                                                                                                                                                                                                                                                                                                                                                                                                                                                                                                                                                                                            |           |                  |                              |                       |                               |         |                                 |         |   |                                    |   |   |                                |   |   |                                               |   |   |                     |   |   |                        |   |   |                                       |   |   |                           |   |   |                            |   |   |
| 415.                                          | <p><b>bl xHkkZoLFkk ds nkSjku de ls de fdlh ,d izloiwoZ tk;p ds fy, D;k vkidks buesa ls fdlh Hkh fo"K; ij lykg feyh \</b><br/>Did you receive advice on any of the following during at least one of your antenatal check-ups for this pregnancy from the ANM/ Sahhiyya?</p> | <table> <thead> <tr> <th></th> <th>YES</th> <th>NO</th> </tr> </thead> <tbody> <tr> <td>Diet .....</td> <td>1</td> <td>2</td> </tr> <tr> <td>Danger signs of pregnancy .....</td> <td>1</td> <td>2</td> </tr> <tr> <td>Where to go for complication .....</td> <td>1</td> <td>2</td> </tr> <tr> <td>Where to go for delivery .....</td> <td>1</td> <td>2</td> </tr> <tr> <td>How to be prepared if delivery starts 1 .....</td> <td>1</td> <td>2</td> </tr> <tr> <td>Delivery care .....</td> <td>1</td> <td>2</td> </tr> <tr> <td>Newborn care .....</td> <td>1</td> <td>2</td> </tr> <tr> <td>Feeding colostrums to the baby 1.....</td> <td>2</td> <td></td> </tr> <tr> <td>Family planning .....</td> <td>1</td> <td>2</td> </tr> <tr> <td>Rest during pregnancy.....</td> <td>1</td> <td>2</td> </tr> </tbody> </table> |           | YES              | NO                           | Diet .....            | 1                             | 2       | Danger signs of pregnancy ..... | 1       | 2 | Where to go for complication ..... | 1 | 2 | Where to go for delivery ..... | 1 | 2 | How to be prepared if delivery starts 1 ..... | 1 | 2 | Delivery care ..... | 1 | 2 | Newborn care .....     | 1 | 2 | Feeding colostrums to the baby 1..... | 2 |   | Family planning .....     | 1 | 2 | Rest during pregnancy..... | 1 | 2 |
|                                               | YES                                                                                                                                                                                                                                                                         | NO                                                                                                                                                                                                                                                                                                                                                                                                                                                                                                                                                                                                                                                                                                                                                                                                                           |           |                  |                              |                       |                               |         |                                 |         |   |                                    |   |   |                                |   |   |                                               |   |   |                     |   |   |                        |   |   |                                       |   |   |                           |   |   |                            |   |   |
| Diet .....                                    | 1                                                                                                                                                                                                                                                                           | 2                                                                                                                                                                                                                                                                                                                                                                                                                                                                                                                                                                                                                                                                                                                                                                                                                            |           |                  |                              |                       |                               |         |                                 |         |   |                                    |   |   |                                |   |   |                                               |   |   |                     |   |   |                        |   |   |                                       |   |   |                           |   |   |                            |   |   |
| Danger signs of pregnancy .....               | 1                                                                                                                                                                                                                                                                           | 2                                                                                                                                                                                                                                                                                                                                                                                                                                                                                                                                                                                                                                                                                                                                                                                                                            |           |                  |                              |                       |                               |         |                                 |         |   |                                    |   |   |                                |   |   |                                               |   |   |                     |   |   |                        |   |   |                                       |   |   |                           |   |   |                            |   |   |
| Where to go for complication .....            | 1                                                                                                                                                                                                                                                                           | 2                                                                                                                                                                                                                                                                                                                                                                                                                                                                                                                                                                                                                                                                                                                                                                                                                            |           |                  |                              |                       |                               |         |                                 |         |   |                                    |   |   |                                |   |   |                                               |   |   |                     |   |   |                        |   |   |                                       |   |   |                           |   |   |                            |   |   |
| Where to go for delivery .....                | 1                                                                                                                                                                                                                                                                           | 2                                                                                                                                                                                                                                                                                                                                                                                                                                                                                                                                                                                                                                                                                                                                                                                                                            |           |                  |                              |                       |                               |         |                                 |         |   |                                    |   |   |                                |   |   |                                               |   |   |                     |   |   |                        |   |   |                                       |   |   |                           |   |   |                            |   |   |
| How to be prepared if delivery starts 1 ..... | 1                                                                                                                                                                                                                                                                           | 2                                                                                                                                                                                                                                                                                                                                                                                                                                                                                                                                                                                                                                                                                                                                                                                                                            |           |                  |                              |                       |                               |         |                                 |         |   |                                    |   |   |                                |   |   |                                               |   |   |                     |   |   |                        |   |   |                                       |   |   |                           |   |   |                            |   |   |
| Delivery care .....                           | 1                                                                                                                                                                                                                                                                           | 2                                                                                                                                                                                                                                                                                                                                                                                                                                                                                                                                                                                                                                                                                                                                                                                                                            |           |                  |                              |                       |                               |         |                                 |         |   |                                    |   |   |                                |   |   |                                               |   |   |                     |   |   |                        |   |   |                                       |   |   |                           |   |   |                            |   |   |
| Newborn care .....                            | 1                                                                                                                                                                                                                                                                           | 2                                                                                                                                                                                                                                                                                                                                                                                                                                                                                                                                                                                                                                                                                                                                                                                                                            |           |                  |                              |                       |                               |         |                                 |         |   |                                    |   |   |                                |   |   |                                               |   |   |                     |   |   |                        |   |   |                                       |   |   |                           |   |   |                            |   |   |
| Feeding colostrums to the baby 1.....         | 2                                                                                                                                                                                                                                                                           |                                                                                                                                                                                                                                                                                                                                                                                                                                                                                                                                                                                                                                                                                                                                                                                                                              |           |                  |                              |                       |                               |         |                                 |         |   |                                    |   |   |                                |   |   |                                               |   |   |                     |   |   |                        |   |   |                                       |   |   |                           |   |   |                            |   |   |
| Family planning .....                         | 1                                                                                                                                                                                                                                                                           | 2                                                                                                                                                                                                                                                                                                                                                                                                                                                                                                                                                                                                                                                                                                                                                                                                                            |           |                  |                              |                       |                               |         |                                 |         |   |                                    |   |   |                                |   |   |                                               |   |   |                     |   |   |                        |   |   |                                       |   |   |                           |   |   |                            |   |   |
| Rest during pregnancy.....                    | 1                                                                                                                                                                                                                                                                           | 2                                                                                                                                                                                                                                                                                                                                                                                                                                                                                                                                                                                                                                                                                                                                                                                                                            |           |                  |                              |                       |                               |         |                                 |         |   |                                    |   |   |                                |   |   |                                               |   |   |                     |   |   |                        |   |   |                                       |   |   |                           |   |   |                            |   |   |
| 416.                                          | <p><b>vki tc xHkZorh Fkh] D;k vkidks vk;ju Qksfyd xksfy;k;@flji feyh Fkh \</b><br/>When you were pregnant with your youngest child, were you given any iron folic tablets or syrup?</p>                                                                                     | <p>Yes .....1</p> <p>No .....2</p> <p>Don't Know .....3</p> <p>(if 2 or 3 skip to 420)</p>                                                                                                                                                                                                                                                                                                                                                                                                                                                                                                                                                                                                                                                                                                                                   |           |                  |                              |                       |                               |         |                                 |         |   |                                    |   |   |                                |   |   |                                               |   |   |                     |   |   |                        |   |   |                                       |   |   |                           |   |   |                            |   |   |
| 417.                                          | <p><b>D;k ml le; vkidks vk;ju Qksfyd xksfy;k; rhu eghus ;k mlls T;knk fnuksa ds fy, nh xbZ Fkh</b><br/>Did you receive enough iron folic tablets or syrup to last about three months or longer?</p>                                                                         | <p>Yes .....1</p> <p>No .....2</p> <p>Don't Know .....3</p> <p>(If 2 or 3 skip to 420)</p>                                                                                                                                                                                                                                                                                                                                                                                                                                                                                                                                                                                                                                                                                                                                   |           |                  |                              |                       |                               |         |                                 |         |   |                                    |   |   |                                |   |   |                                               |   |   |                     |   |   |                        |   |   |                                       |   |   |                           |   |   |                            |   |   |
| 418.                                          | <p><b>vkius fdruk vk;ju xksyh@flji [kk;k \</b><br/>How many of the iron folic tablets or syrup did you consume?<br/>(if all skip to 423)</p>                                                                                                                                | <p>All .....1</p> <p>Most. ....2</p> <p>Few, .....3</p> <p>None .....9</p>                                                                                                                                                                                                                                                                                                                                                                                                                                                                                                                                                                                                                                                                                                                                                   |           |                  |                              |                       |                               |         |                                 |         |   |                                    |   |   |                                |   |   |                                               |   |   |                     |   |   |                        |   |   |                                       |   |   |                           |   |   |                            |   |   |
| 419.                                          | <p>Why you did not consume all tablets?<br/><b>vkius lkjh xksfy;ka D;ksa ugha [kkbZ \</b></p>                                                                                                                                                                               | <p>Not necessary .....1</p> <p>Forgot .....2</p> <p>Stopped due to problem .....3</p> <p>Other .....4</p>                                                                                                                                                                                                                                                                                                                                                                                                                                                                                                                                                                                                                                                                                                                    |           |                  |                              |                       |                               |         |                                 |         |   |                                    |   |   |                                |   |   |                                               |   |   |                     |   |   |                        |   |   |                                       |   |   |                           |   |   |                            |   |   |



Baseline HH questionnaire

|      |                                                                                                                                                                                                                                                                                                                                                                                                               |                                                                         |
|------|---------------------------------------------------------------------------------------------------------------------------------------------------------------------------------------------------------------------------------------------------------------------------------------------------------------------------------------------------------------------------------------------------------------|-------------------------------------------------------------------------|
| 420. | <p><b>vki (Ukke) -----</b><br/> <b>ds le; tc xHkZorh Fkh] rks D;k</b><br/> <b>vkidks vkSj vkids gksus okys cPps</b><br/> <b>dkS VsVul ls cpkus ds fy, ck;g esa</b><br/> <b>Vhdk (batsD'ku yxk;k x;k Fkk \</b><br/>                 When you were pregnant with your youngest child, were you given an injection in the arm to prevent you and the baby from getting tetanus (use local term for tetanus)?</p> | Yes .....1<br>No .....2<br>Don't Know .....3<br>(if 2 or 3 skip to 501) |
| 421. | <p><b>bl xHkkZoLFkk ds nkSjku vkidks</b><br/> <b>fdruh ckj ;g Vhdk (batsD'ku) yxk;k</b><br/> <b>x;k Fkk \</b><br/>                 When you were pregnant with your last child, how many times did you get this injection?</p>                                                                                                                                                                                | Times injected ..... <input type="text"/>                               |

|     | Delivery                                                                                                                                                                                                                                                                                                                                                                                      |                                                                                                                                                                                                                                                                                                                            |
|-----|-----------------------------------------------------------------------------------------------------------------------------------------------------------------------------------------------------------------------------------------------------------------------------------------------------------------------------------------------------------------------------------------------|----------------------------------------------------------------------------------------------------------------------------------------------------------------------------------------------------------------------------------------------------------------------------------------------------------------------------|
| 501 | <p><b>(Ukke) ----- dk tUe</b><br/> <b>dgk; gqvk Fkk \</b><br/>                 Where did you give birth to your youngest child? (For answers 21-31, skip to 505)<br/>                 If source is hospital or clinic, write the name of the place. Probe to identify the type of place and circle the appropriate code.</p> <p><b>vxj mRrj 21&amp;31 gks rks 505 ij</b><br/> <b>tk,a</b></p> | Your home .....11<br>Parents' home .....12<br>Other home .....13<br><br><b>Public Medical Sector</b><br>CHC/PHC .....21<br>Sub-Centre .....22<br>NGO/Trust Hospital/Clinic .....23<br><br><b>Private Medical Sector</b><br>Pvt. hospital/Clinic .....31<br><br>Other.....99<br>(specify)                                   |
| 502 | <p><b>dkSu lk eq]; dkj.k Fkk ftldh otg ls</b><br/> <b>vki izlo ds fy, LokLF; lqfo/kk esa</b><br/> <b>ugha xbZ \</b><br/>                 What is the main reason you did not go to a health facility for delivery?</p>                                                                                                                                                                        | Not necessary .....01<br>Not customary .....02<br>Cost too much .....03<br>Too far/no transport .....04<br>Poor quality service .....05<br>No time to go .....06<br>Family did not allow .....07<br>Better care at home .....08<br>Lack of knowledge .....09<br>Nobody to accompany.....10<br>Other .....(specify) .....99 |
| 503 | <p><b>cPps dk tUe dgk; gks] bldk fu.kZ;</b><br/> <b>fdlus fy;k\</b><br/>                 Who mainly made the decision where to give birth?</p>                                                                                                                                                                                                                                                | Respondent .....01<br>Husband .....02<br>In-Laws .....03<br>Parents .....04<br>Sister/Sister-In-Law .....05<br>Other member in husband's family .....06<br>Other member in respondent's family .....07<br>Relatives .....08<br>Friend/Neighbour .....09<br>TBA/Field Worker/DAI .....10<br>Other .....(specify) .....99    |
| 504 | <p><b>izlo ds le; fdlus lgk;rk dh Fkh \</b><br/>                 Who assisted with the delivery of your youngest child?</p>                                                                                                                                                                                                                                                                   | (For answers A, B, or C skip to XXXX)<br><br><b>Health Professional</b><br>Doctor .....A<br>ANM/Nurse/Midwife/LHV .....B<br>Other Health Professional (specify) .....C                                                                                                                                                     |

**Baseline HH questionnaire**

|                                                  | <p>Anyone else?</p> <p>Probe for the type of person and record all persons who assisted.</p>                                                                               | <p><b>Other Person</b></p> <p>DAI (TBA) .....D</p> <p>Friend/Relative .....E</p> <p>Husband .....F</p> <p>Other (specify) .....X</p> <p>No one .....Y</p>                                                                                                                                                                                                                                                                                                                                        |         |     |    |                    |   |   |                   |   |   |             |   |   |                                                  |   |   |                  |   |   |
|--------------------------------------------------|----------------------------------------------------------------------------------------------------------------------------------------------------------------------------|--------------------------------------------------------------------------------------------------------------------------------------------------------------------------------------------------------------------------------------------------------------------------------------------------------------------------------------------------------------------------------------------------------------------------------------------------------------------------------------------------|---------|-----|----|--------------------|---|---|-------------------|---|---|-------------|---|---|--------------------------------------------------|---|---|------------------|---|---|
| 505                                              | <p><b>D;k eq; dkj.k gS ftlds dkj.k vki fdlh LokLF; fo'ks"kk dh lgk;rk ugha yh \</b></p> <p>What is the main reason you did not take the help of a health professional?</p> | <p>Not necessary .....01</p> <p>Not customary .....02</p> <p>Cost too much .....03</p> <p>Too far/no transport .....04</p> <p>Professional not available .....05</p> <p>No confidence in available profession .....06</p> <p>No time to get help .....07</p> <p>Family did not allow .....08</p> <p>Other .....(specify) .....99</p>                                                                                                                                                             |         |     |    |                    |   |   |                   |   |   |             |   |   |                                                  |   |   |                  |   |   |
| 506                                              | <p><b>izlo ihM+k fdruh nsj rd pyh Fkh \</b></p> <p>How long did the labour last?</p>                                                                                       | <p>Hours ..... <input type="text"/> <input type="text"/></p>                                                                                                                                                                                                                                                                                                                                                                                                                                     |         |     |    |                    |   |   |                   |   |   |             |   |   |                                                  |   |   |                  |   |   |
| 507                                              | <p><b>izlo ds le; dksbZ tfVyrk vkbZ Fkh \ D;k \</b></p> <p>Were there any complications during labour/delivery?</p> <p>List all that apply.</p>                            | <table border="1"> <thead> <tr> <th>Problem</th> <th>YES</th> <th>NO</th> </tr> </thead> <tbody> <tr> <td>Excessive bleeding</td> <td>1</td> <td>2</td> </tr> <tr> <td>Tears/lacerations</td> <td>1</td> <td>2</td> </tr> <tr> <td>Long labour</td> <td>1</td> <td>2</td> </tr> <tr> <td>Delayed expulsion of placenta (more than 1/2 hr)</td> <td>1</td> <td>2</td> </tr> <tr> <td>No complications</td> <td>1</td> <td>2</td> </tr> </tbody> </table> <p>(If no complications skip to 5XX)</p> | Problem | YES | NO | Excessive bleeding | 1 | 2 | Tears/lacerations | 1 | 2 | Long labour | 1 | 2 | Delayed expulsion of placenta (more than 1/2 hr) | 1 | 2 | No complications | 1 | 2 |
| Problem                                          | YES                                                                                                                                                                        | NO                                                                                                                                                                                                                                                                                                                                                                                                                                                                                               |         |     |    |                    |   |   |                   |   |   |             |   |   |                                                  |   |   |                  |   |   |
| Excessive bleeding                               | 1                                                                                                                                                                          | 2                                                                                                                                                                                                                                                                                                                                                                                                                                                                                                |         |     |    |                    |   |   |                   |   |   |             |   |   |                                                  |   |   |                  |   |   |
| Tears/lacerations                                | 1                                                                                                                                                                          | 2                                                                                                                                                                                                                                                                                                                                                                                                                                                                                                |         |     |    |                    |   |   |                   |   |   |             |   |   |                                                  |   |   |                  |   |   |
| Long labour                                      | 1                                                                                                                                                                          | 2                                                                                                                                                                                                                                                                                                                                                                                                                                                                                                |         |     |    |                    |   |   |                   |   |   |             |   |   |                                                  |   |   |                  |   |   |
| Delayed expulsion of placenta (more than 1/2 hr) | 1                                                                                                                                                                          | 2                                                                                                                                                                                                                                                                                                                                                                                                                                                                                                |         |     |    |                    |   |   |                   |   |   |             |   |   |                                                  |   |   |                  |   |   |
| No complications                                 | 1                                                                                                                                                                          | 2                                                                                                                                                                                                                                                                                                                                                                                                                                                                                                |         |     |    |                    |   |   |                   |   |   |             |   |   |                                                  |   |   |                  |   |   |
| 508                                              | <p>Did you seek treatment for this?</p> <p><b>D;k vkius fpdfRlk djkbZ \</b></p>                                                                                            | <p>Yes .....1</p> <p>No .....2</p> <p>(skip to 5XX)</p>                                                                                                                                                                                                                                                                                                                                                                                                                                          |         |     |    |                    |   |   |                   |   |   |             |   |   |                                                  |   |   |                  |   |   |
| 509                                              | <p>Where did you go?</p> <p><b>fpfdRlk ds fy, vki dgka xbZ Fkh \</b></p>                                                                                                   | <p><b>Public Medical Sector</b></p> <p>Govt. Hospital .....11</p> <p>CHC/PHC .....12</p> <p>Sub-Centre .....13</p> <p>NGO/Trust Hospital/Clinic.....14</p> <p>NGO mobile clinic ..... 15</p> <p><b>Private Medical Sector</b></p> <p>Pvt. hospital/Clinic/Maternity Home.....21</p> <p>Pvt. Mobile Clinic.....22</p> <p>Pharmacy/Drugstore.....23</p> <p>Other Private Sector Health Facility.....24</p> <p>Other .....(specify) .....99</p>                                                     |         |     |    |                    |   |   |                   |   |   |             |   |   |                                                  |   |   |                  |   |   |
| 510                                              | <p><b>ml lqfo/kk esa vki dSlS x;h Fkha \</b></p> <p>How did you reach the facility?<br/>(Record All)</p>                                                                   | <p>On foot .....A</p> <p>By private vehicle .....B</p> <p>By government vehicle .....C</p> <p>Other .....(specify) .....X</p>                                                                                                                                                                                                                                                                                                                                                                    |         |     |    |                    |   |   |                   |   |   |             |   |   |                                                  |   |   |                  |   |   |

|     |                                                                                                                                                                                                                                                                           |                                                                             |
|-----|---------------------------------------------------------------------------------------------------------------------------------------------------------------------------------------------------------------------------------------------------------------------------|-----------------------------------------------------------------------------|
| 511 | <p><b>(Ukke) ----- ds tUe ds fdrus le; ckn vkius mls Lruiku dj;k \</b></p> <p>How long after birth did you first put (NAME) to the breast?</p> <p>IF LESS THAN HALF AN HOUR, CIRCLE '000'.</p> <p>IF LESS THAN 24 HOURS, RECORD HOURS.</p> <p>OTHERWISE, RECORD DAYS.</p> | <p>IMMEDIATELY/</p> <p>WITHIN HALF AN HOUR</p> <p>HOURS 1</p> <p>DAYS 2</p> |
|-----|---------------------------------------------------------------------------------------------------------------------------------------------------------------------------------------------------------------------------------------------------------------------------|-----------------------------------------------------------------------------|

**Baseline HH questionnaire**

| <p><b>D;k vkus Lru dks f'k'kq ls yxkus ds iwoZ igyk nw/k fupksM+k Fkk \</b><br/>                 Did you discard out the milk from the breast before you first put your youngest child to the breast?</p> |                                                                                                                                                                                                                                                                                                                                                                                                                                                | Yes-----1<br>No-----2                                                                                                                                                                                                                                                                                                                                                                   |  |     |    |             |   |   |           |   |   |       |   |   |                 |   |   |                 |  |  |
|-----------------------------------------------------------------------------------------------------------------------------------------------------------------------------------------------------------|------------------------------------------------------------------------------------------------------------------------------------------------------------------------------------------------------------------------------------------------------------------------------------------------------------------------------------------------------------------------------------------------------------------------------------------------|-----------------------------------------------------------------------------------------------------------------------------------------------------------------------------------------------------------------------------------------------------------------------------------------------------------------------------------------------------------------------------------------|--|-----|----|-------------|---|---|-----------|---|---|-------|---|---|-----------------|---|---|-----------------|--|--|
| 513                                                                                                                                                                                                       | <p><b>D;k tUe ds le; f'k'kq dks dksbZ LokLF; leL;k Fkh \</b><br/>                 Was the baby suffering from any complications at birth?</p>                                                                                                                                                                                                                                                                                                  | Yes ..... 1<br>No ..... 2<br>(If no, skip to 601)                                                                                                                                                                                                                                                                                                                                       |  |     |    |             |   |   |           |   |   |       |   |   |                 |   |   |                 |  |  |
| 514                                                                                                                                                                                                       | <p><b>D;k leL;k Fkh \</b><br/>                 Which complications?<br/>                 vk;[k yky<br/>                 ihyk is'kkc@peZ<br/>                 conjunctiva / Yellowish colouration of urine / skin<br/>                 lkal esa fnDdr<br/>                 Difficulty in breathing<br/>                 cq[kkj<br/>                 Fever<br/>                 pwlus esa fnDdr<br/>                 Fever + refusal to suck</p> | <table border="1"> <thead> <tr> <th></th> <th>Yes</th> <th>No</th> </tr> </thead> <tbody> <tr> <td>Conjunctiva</td> <td>1</td> <td>2</td> </tr> <tr> <td>Breathing</td> <td>1</td> <td>2</td> </tr> <tr> <td>Fever</td> <td>1</td> <td>2</td> </tr> <tr> <td>Fever + Refusal</td> <td>1</td> <td>2</td> </tr> <tr> <td>Other (specify)</td> <td></td> <td></td> </tr> </tbody> </table> |  | Yes | No | Conjunctiva | 1 | 2 | Breathing | 1 | 2 | Fever | 1 | 2 | Fever + Refusal | 1 | 2 | Other (specify) |  |  |
|                                                                                                                                                                                                           | Yes                                                                                                                                                                                                                                                                                                                                                                                                                                            | No                                                                                                                                                                                                                                                                                                                                                                                      |  |     |    |             |   |   |           |   |   |       |   |   |                 |   |   |                 |  |  |
| Conjunctiva                                                                                                                                                                                               | 1                                                                                                                                                                                                                                                                                                                                                                                                                                              | 2                                                                                                                                                                                                                                                                                                                                                                                       |  |     |    |             |   |   |           |   |   |       |   |   |                 |   |   |                 |  |  |
| Breathing                                                                                                                                                                                                 | 1                                                                                                                                                                                                                                                                                                                                                                                                                                              | 2                                                                                                                                                                                                                                                                                                                                                                                       |  |     |    |             |   |   |           |   |   |       |   |   |                 |   |   |                 |  |  |
| Fever                                                                                                                                                                                                     | 1                                                                                                                                                                                                                                                                                                                                                                                                                                              | 2                                                                                                                                                                                                                                                                                                                                                                                       |  |     |    |             |   |   |           |   |   |       |   |   |                 |   |   |                 |  |  |
| Fever + Refusal                                                                                                                                                                                           | 1                                                                                                                                                                                                                                                                                                                                                                                                                                              | 2                                                                                                                                                                                                                                                                                                                                                                                       |  |     |    |             |   |   |           |   |   |       |   |   |                 |   |   |                 |  |  |
| Other (specify)                                                                                                                                                                                           |                                                                                                                                                                                                                                                                                                                                                                                                                                                |                                                                                                                                                                                                                                                                                                                                                                                         |  |     |    |             |   |   |           |   |   |       |   |   |                 |   |   |                 |  |  |

| <p><b>Postpartum Care</b><br/>                 Now I would like to ask you about the 1-month period after the delivery of your youngest child.</p> |                                                                                                                                                                                                                                                           |                                                                                                                                                                                                                                                                                                                                                                                                                                   |  |     |    |         |   |   |    |   |   |               |   |   |           |   |   |
|----------------------------------------------------------------------------------------------------------------------------------------------------|-----------------------------------------------------------------------------------------------------------------------------------------------------------------------------------------------------------------------------------------------------------|-----------------------------------------------------------------------------------------------------------------------------------------------------------------------------------------------------------------------------------------------------------------------------------------------------------------------------------------------------------------------------------------------------------------------------------|--|-----|----|---------|---|---|----|---|---|---------------|---|---|-----------|---|---|
| 601                                                                                                                                                | <p><b>cPps ds tUe ds nks eghus ckn rd D;k vkids cPps ;k vkids LokLF; dh tk;p fdlh LokLF; fo'ks"kk }kjk dh xbZ \</b><br/>                 During that period, did a doctor or other health professional check your health or the health of your baby?</p>  | Yes ..... 1<br>No ..... 2<br>(skip to 606)                                                                                                                                                                                                                                                                                                                                                                                        |  |     |    |         |   |   |    |   |   |               |   |   |           |   |   |
| 602                                                                                                                                                | <p><b>vkids lcls NksVs cPps ds tUe ds fdrus fnu ckn igyh tk;p dh xbZ Fkh \</b><br/>                 How soon after the birth of your youngest child did you first get a check-up?</p>                                                                     | Same day of birth..... <input type="checkbox"/> <input type="checkbox"/><br>At Day ..... <input type="checkbox"/> <input type="checkbox"/><br>In Week..... <input type="checkbox"/> <input type="checkbox"/>                                                                                                                                                                                                                      |  |     |    |         |   |   |    |   |   |               |   |   |           |   |   |
| 603                                                                                                                                                | <p><b>;s tk;p dgk; dh xbZ Fkh \</b><br/>                 Where did you get the check-up?<br/><br/>                 If source is hospital or clinic, write the name of the place. Probe to identify the type of place and circle the appropriate code.</p> | Home Visit ..... 10<br><br><b>Public Medical Sector</b><br>Govt. Hospital ..... 11<br>CHC/ PHC ..... 12<br>Sub-Centre ..... 13<br>NGO/Trust Hospital/Clinic..... 14<br>NGO mobile clinic..... 15<br><br><b>Private Medical Sector</b><br>Pvt. hospital/Clinic/Maternity Home..... 21<br>Pvt. Mobile Clinic..... 22<br>Pharmacy/Drugstore..... 23<br>Other Private Sector Health Facility..... 24<br>Other ..... (specify)..... 99 |  |     |    |         |   |   |    |   |   |               |   |   |           |   |   |
| 604                                                                                                                                                | <p><b>D;k buesa ls dksbZ tk;p fd;k x;k Fkk \</b><br/>                 Did any of the following happen when you had the check-up:<br/>                 Was your abdomen examined?<br/>                 Did you receive advice on family planning?</p>      | <table border="1"> <thead> <tr> <th></th> <th>YES</th> <th>NO</th> </tr> </thead> <tbody> <tr> <td>Abdomen</td> <td>1</td> <td>2</td> </tr> <tr> <td>FP</td> <td>1</td> <td>2</td> </tr> <tr> <td>Breastfeeding</td> <td>1</td> <td>2</td> </tr> <tr> <td>Baby care</td> <td>1</td> <td>2</td> </tr> </tbody> </table>                                                                                                            |  | YES | NO | Abdomen | 1 | 2 | FP | 1 | 2 | Breastfeeding | 1 | 2 | Baby care | 1 | 2 |
|                                                                                                                                                    | YES                                                                                                                                                                                                                                                       | NO                                                                                                                                                                                                                                                                                                                                                                                                                                |  |     |    |         |   |   |    |   |   |               |   |   |           |   |   |
| Abdomen                                                                                                                                            | 1                                                                                                                                                                                                                                                         | 2                                                                                                                                                                                                                                                                                                                                                                                                                                 |  |     |    |         |   |   |    |   |   |               |   |   |           |   |   |
| FP                                                                                                                                                 | 1                                                                                                                                                                                                                                                         | 2                                                                                                                                                                                                                                                                                                                                                                                                                                 |  |     |    |         |   |   |    |   |   |               |   |   |           |   |   |
| Breastfeeding                                                                                                                                      | 1                                                                                                                                                                                                                                                         | 2                                                                                                                                                                                                                                                                                                                                                                                                                                 |  |     |    |         |   |   |    |   |   |               |   |   |           |   |   |
| Baby care                                                                                                                                          | 1                                                                                                                                                                                                                                                         | 2                                                                                                                                                                                                                                                                                                                                                                                                                                 |  |     |    |         |   |   |    |   |   |               |   |   |           |   |   |

**Baseline HH questionnaire**

|                           |                                                                                                                                                                                               |                                                                                                                                                                                                                          |  |            |           |                           |   |   |                  |   |   |
|---------------------------|-----------------------------------------------------------------------------------------------------------------------------------------------------------------------------------------------|--------------------------------------------------------------------------------------------------------------------------------------------------------------------------------------------------------------------------|--|------------|-----------|---------------------------|---|---|------------------|---|---|
|                           | Did you receive advice on breastfeeding?<br>Did you receive advice on baby care?<br>Did you receive advice on diet?                                                                           | Diet.....1 2                                                                                                                                                                                                             |  |            |           |                           |   |   |                  |   |   |
| 605                       | <b>D;k igys ls lIrk g esa vkidk dksbZ vfrfjDr tk;p fd;k x;k Fkk \</b><br>Did you receive any second check up within the first week?                                                           | Yes .....1<br>No .....2                                                                                                                                                                                                  |  |            |           |                           |   |   |                  |   |   |
| 606                       | <b>izlo ds nks ekg ds vUnj D;k vkidks buesa ls dqN leL;k gqbZ Fkh \</b><br>At any time during the first 6 weeks after the delivery of your youngest child, did you have any of the following: | <table border="0"> <tr> <td></td> <td><b>YES</b></td> <td><b>NO</b></td> </tr> <tr> <td>Massive vaginal bleeding?</td> <td>1</td> <td>2</td> </tr> <tr> <td>Very high fever?</td> <td>1</td> <td>2</td> </tr> </table>   |  | <b>YES</b> | <b>NO</b> | Massive vaginal bleeding? | 1 | 2 | Very high fever? | 1 | 2 |
|                           | <b>YES</b>                                                                                                                                                                                    | <b>NO</b>                                                                                                                                                                                                                |  |            |           |                           |   |   |                  |   |   |
| Massive vaginal bleeding? | 1                                                                                                                                                                                             | 2                                                                                                                                                                                                                        |  |            |           |                           |   |   |                  |   |   |
| Very high fever?          | 1                                                                                                                                                                                             | 2                                                                                                                                                                                                                        |  |            |           |                           |   |   |                  |   |   |
| 607                       | <b>D;k vkus fpfdRlk djkbZ Fkh \</b><br>Did you seek treatment?                                                                                                                                | Yes .....1<br>No .....2                                                                                                                                                                                                  |  |            |           |                           |   |   |                  |   |   |
| 608                       | <b>;s tk;p dgk; dh xbZ Fkh \</b><br>Where did you get the treatment?                                                                                                                          | <p><b>Public Medical Sector</b></p> Govt. Hospital .....11<br>CHC/ PHC .....12<br>Sub-Centre .....13<br>NGO/Trust Hospital/Clinic.....14<br>NGO mobile clinic.....15                                                     |  |            |           |                           |   |   |                  |   |   |
|                           |                                                                                                                                                                                               | <p><b>Private Medical Sector</b></p> Pvt. hospital/Clinic/Maternity Home.....21<br>Pvt. Mobile Clinic.....22<br>Pharmacy/Drugstore.....23<br>Other Private Sector Health Facility.....24<br>Other .....(specify) .....99 |  |            |           |                           |   |   |                  |   |   |

|     |                                                                                                                                                                                  |                                                                                                                                                                                                  |
|-----|----------------------------------------------------------------------------------------------------------------------------------------------------------------------------------|--------------------------------------------------------------------------------------------------------------------------------------------------------------------------------------------------|
| 609 | <b>D;k vkus Lru dks f'k'kq ls yxkus ds iwoZ igyk nw/k fupksM+k Fkk \</b><br>Did you discard out the milk from the breast before you first put your youngest child to the breast? | Yes.....1<br>No.....2                                                                                                                                                                            |
| 610 | In the first three days after delivery, was (NAME) given anything to drink other than breast milk?                                                                               | <b>YES</b><br><b>NO</b>                                                                                                                                                                          |
|     | What was (NAME) given to drink?<br><br>Anything else?<br><br>RECORD<br>ALL                                                                                                       | MILK (OTHER THAN BREAST MILK)<br>PLAIN WATER<br>SUGAR OR GLUCOSE WATER<br>GRUPE WATER<br>SUGAR-SALT-WATER SOLUTION<br><br>FRUIT JUICE<br>INFANT FORMULA<br>TEA<br>HONEY<br>JANAM GHUTTI<br>OTHER |

(SP)
